# Supplementary material
Source: publisher figshare collection journal article supplement (https://gsapubs.figshare.com/ndownloader/files/23296040)
Supplement: Supplementary file 1 [file 23296040]

# GSA DATA REPOSITORY 201327+

## Supplementary Material

### The thickness of subduction plate boundary faults from the seafloor into the seismogenic zone

Christie D. Rowe<sup>1\*</sup>, J. Casey Moore<sup>2</sup>, Francesca Remitti<sup>3</sup> and the Expedition 343/343T Science Party.

#### *Expedition 343/343T Science Party (alphabetical order):*

Louise Anderson<sup>4</sup>, Jan H. Behrmann<sup>5</sup>, Santanu Bose<sup>6</sup>, Emily E. Brodsky<sup>2</sup>, Frederick M. Chester<sup>7</sup>, Marianne Conin<sup>8</sup>, Becky Cook<sup>9</sup>, Nobuhisa Eguchi<sup>10</sup>, Patrick Fulton<sup>11</sup>, Takehiro Hirose<sup>12</sup>, Matt Ikari<sup>13</sup>, Tsuyoshi Ishikawa<sup>12</sup>, Tamara Jeppson<sup>14</sup>, Jun Kameda<sup>15</sup>, Yukari Kido<sup>10</sup>, James Kirkpatrick<sup>16</sup>, Shuichi Kodaira<sup>17</sup>, Weiren Lin<sup>12</sup>, Lena Maeda<sup>10</sup>, Toshiaki Mishima<sup>18</sup>, James J. Mori<sup>19</sup>, Yasuyuki Nakamura<sup>17</sup>, Christine Regalla<sup>20</sup>, Saneatsu Saito<sup>17</sup>, James Sample<sup>21</sup>, Yoshinori Sanada<sup>10</sup>, Tianhaozhe Sun<sup>22</sup>, Ken Takai<sup>23</sup>, Sean Toczko<sup>10</sup>, Virginia Toy<sup>24</sup>, Kohtaro Ujiie<sup>25</sup>, Monica Wolfson-Schwehr<sup>26</sup>, Tao Yang<sup>27</sup>

<sup>1</sup>Department of Earth & Planetary Sciences, McGill University, 3450 University St., Montréal, QC H2A 0E8. \*christie.rowe@mcgill.ca

<sup>2</sup>Department of Earth and Planetary Sciences, University of California Santa Cruz, 1156 High St., Santa Cruz, CA 95064 USA

<sup>3</sup>Dipartimento di Scienze Chimiche e Geologiche, University of Modena and Reggio Emilia, largo S. Eufemia, 19 – 41125 Modena, Italy

<sup>4</sup>Department of Geology, University of Leicester, University Road, Leicester LE1 7RH United Kingdom

<sup>5</sup>GEOMAR, Helmholtz Centre for Ocean Research Kiel, Wischhofstraße 1-3, 24148 Kiel Germany

<sup>6</sup>University of Calcutta, Department of Geology, 35 Ballygunge Circular Road, Kolkata-700 019 India

<sup>7</sup>Center for Tectonophysics, Department of Geology and Geophysics, Texas A&M University, College Station TX 77843-3115 USA

<sup>8</sup>CEREGE, Europôle Méditerranéen de l'Arbois, Avenue Louis Philibert, BP 80, 13545 Aix en Provence Cedex 04 France; now at EA4098 LaRGE, Université des Antilles et de la Guyane, Pointe-à-Pitre, France

<sup>9</sup>National Oceanography Centre, Southampton (NOCS), University of Southampton Waterfront Campus, European Way Southampton SO14 3ZH United Kingdom

<sup>10</sup>Center for Deep Earth Exploration, Japan Agency for Marine-Earth Science and Technology, 3173-25 Showa-machi, Kanazawa-ku, Yokohama, Kanagawa 236-0001 Japan

<sup>11</sup>Institute for Geophysics (UTIG) University of Texas Austin, J.J. Pickle Research Campus, 10100 Burnet Road (R2200) Austin TX 78758-4445 USA; now at Department Earth and Planetary Sciences, University of California, Santa Cruz CA 95064 USA

<sup>12</sup>Kochi Institute for Core Sample Research, Japan Agency for Marine-Earth Science and Technology, 200 Monobe Otsu, Nankoku City, Kochi 783-8502 Japan

<sup>13</sup>Center for Marine Environmental Science, (MARUM) University of Bremen, Leobener Strasse, D-28359 Bremen Germany

<sup>14</sup>University of Wisconsin-Madison, Department of Geoscience, 1215 West Dayton Street, Madison WI

53706 USA

<sup>15</sup>The University of Tokyo, Department of Earth and Planetary Science, 7-3-1 Hongo, Bunkyo, Tokyo 113-0033 Japan

<sup>16</sup>Department of Geosciences, Colorado State University, Fort Collins, CO 80523-1482, USA

<sup>17</sup>Institute for Research on Earth Evolution (IFREE), Japan Agency for Marine-Earth Science and Technology, 2-15 Natsushima-cho, Yokosuka, Kanagawa 237-0061 Japan

<sup>18</sup>Graduate School of Science, Osaka City University, 3-3-138 Sugimoto Sumiyoshi-ku, Osaka City, Osaka 558-8585 Japan

<sup>19</sup>Earthquake Hazards Division, Disaster Prevention Research Institute, Kyoto University Gokasho, Uji Kyoto 611-0011 Japan

<sup>20</sup>Department of Geosciences, The Pennsylvania State University, University Park PA 16802 USA

<sup>21</sup>Program in Geology, School of Earth Sciences and Environmental Sustainability, Northern Arizona University, Flagstaff AZ 86011-4099 USA

<sup>22</sup>University of Victoria, School of Earth and Ocean Sciences, PO Box 1700 STN CSC Victoria BC V8W 2Y2 Canada

<sup>23</sup>Subsurface Geobiology Advanced Research Project and Precambrian Ecosystem Laboratory, Extraterrestrial Life from Dark Universe, Japan Agency for Marine-Earth Science and Technology, 2-15 Natsushima-cho, Yokosuka, Kanagawa 237-0061 Japan

<sup>24</sup>Department of Geology University of Otago, 360 Leith Walk, Dunedin 9054 New Zealand

<sup>25</sup>Graduate School of Life and Environmental Sciences, University of Tsukuba, 1-1-1 Tennodai, Tsukuba 305-0006 Japan

<sup>26</sup>Center for Coastal and Ocean Mapping, Joint Hydrographic Center, University of New Hampshire, 24 Colovos Road, Durham NH 03824 USA

<sup>27</sup>Institute of Geophysics, China Earthquake Administration, No. 5 Minzu Daxue South Road Haidian District, Beijing 100081 China

## ***Details of compiled fault measurements***

### **Above the seismogenic zone (<3-5 km or T<100-150°)**

The shallowest portion of the subduction thrust interface is the only part directly investigated by ocean drilling. The insights from recovered core across active faults can be used to help calibrate the seismic reflection images from farther landward and deeper on the faults. Shallow diagenesis, dewatering and compaction causes the evolution of the thickness, strength and permeability of the subducting sediments as they are transported down dip. Compaction during deformation of the sediment in this shallow environment is thought to contribute to shear hardening, encouraging time-progressive thickening of the deformed zone (Moore & Byrne 1987).

### ***Costa Rica – Sites 1040, 1043 and 1254***

The subduction décollement in the Costa Rica Trench was penetrated at two sites by IODP Leg 170. Site 1040 is located 1.6 km landward of the deformation front and intersected the décollement, identified by biostratigraphic inversion, at 351 m below sea floor. At Site 1043, 400 m landward of the trench, the décollement was encountered 146 mbsf and was 9.07 m thick. There, the décollement was identified by incipient scaly foliation, biostratigraphic inversion and changes in paleomagnetic polarity (Shipboard Scientific Party, 1997). At Site 1254, penetrated on a subsequent drilling leg (Leg 205), the décollement had structural thickness of ~45 m. Discrete faults 3-8 cm thick are

reported (Shipboard Scientific Party, 2003). The apparent discrepancy between the observations at two closely spaced holes (1040 and 1254) could probably be reconciled by comparison of the drilling/recovery damage of the cores that may have affected the recorded observations.

### ***Barbados Prism – ODP Sites 948, 1044, 1045***

Several DSDP and ODP Expeditions sampled the Barbados Prism near the toe and out to the deformation front where the décollement is weakly developed. Site 948 drilled during Leg 156 revealed a detailed section through the décollement, involving a zone of intensely scaly foliated parallel fault strands about 1-2 m thick over a total structural thickness of ~31 m. The lithologic décollement lies in about the center of this zone at 514 mbsf, indicating that plate motion is accommodated by deformation of both hanging wall and footwall sediments along the décollement surface. During Leg 171, the décollement was identified in structural measurements on core, as well as LWD logs and by correlation to the structural architecture described during Leg 156. Two measurements were made of the décollement, which consisted of a single strand in both holes (Shipboard Scientific Party, 1988; 1998).

### ***Nankai Trough***

Four measurements are available for décollement thickness in the Nankai Trough: at 422 m (IODP Exp. 316 C0007), 807 m (ODP Leg 190, Site 1174), 897 m (ODP Leg 196, Site 808, Hole 808C) and 945 m (Leg 131, Site 808, Hole 808 I). Coring at Site 808 (Leg 131) revealed a deformed zone 19.2 m thick with sharp boundaries, but it is not described in detail in the Proceedings. The same Site 808 was logged during Leg 196 revealing a thicker, more complicated décollement structure, consisting of three intensely sheared faults 5-7 m thick within a structural thickness of 68 m. The uppermost edge of the zone is a 1.5 m-thick breccia observed in the core. IODP Exp. 316 measured the frontal thrust (décollement near the trench) at 47.5 m thick but also recovered discrete slip surfaces ~2 mm thick which show an increase in vitrinite reflectance interpreted as evidence for shear and shear heating (Fulton and Harris, 2012; Sakaguchi et al., 2011).

### ***Japan Trench Megathrust***

The subduction thrust interface off northeast Japan was sampled during IODP Expedition 343, 14 months after the Tohoku-Oki earthquake and tsunami of March 11, 2011. The décollement was sampled at a depth of 821 m below the sea floor, where we estimate it had accumulated ~ 3.2 km of displacement (Chester et al., *submitted*). The intensely sheared fault itself was incompletely recovered, but has a maximum thickness of <4.86 m, and is localized within scaly clays of the subducting section (Chester et al., *submitted*, *Science Party Preliminary Report Exp. 343*). Discrete individual slip surfaces of < 1 mm thickness were described cutting the scaly clay fabric. The actual contact between the older wedge sediments of the hanging wall and the sheared pelagic clays of the footwall was not recovered, but must lie within a  $\leq 1.5$  m gap between recovered cores. For the

purposes of this compilation, the single fault strand represents the entire deformed thickness of the décollement, so the measures of total fault thickness and fault strand are the same ( $\leq 4.87$  m).

### ***Sestola-Vidiciatico Unit***

The Sestola-Vidiciatico Unit is a shallow frontal thrust preserved in the Northern Apennines, Italy, estimated to have been active at  $< 5$  km depth and  $100-150^{\circ}\text{C}$  during the early to mid-Miocene (*Reutter et al., 1983; Thompson et al. 2010; Vannucchi et al., 2008; Zattin et al. 2002*). The total shear strain is accommodated by several geologically contemporaneously active anastomosing high-strain strands separated by largely undeformed tectonic slices which preserve preexisting deformation structures (Remitti et al., 2007; Vannucchi et al. 2008; 2012). The total fault thickness is 200-500 m, within which individual high-strain strands are up to a few meters thick but usually  $< 10$  cm. Sharp brittle faults  $< 3$  cm thick are abundant and veined with calcite slickenfibers.

### **Upper seismogenic zone**

A large number of preserved plate boundary thrusts from accretionary complexes can be shown to have underplated at  $\sim 250^{\circ}\text{C}$ , corresponding to probable depths of 10-20 km, where mafic rocks are characterized by prehnite-pumpellyite facies metamorphism, and clastic sediments show evidence of diagenesis of clays and organic matter and albitization of feldspars (c.f. Moore and Saffer, 2001). Cataclasis and solution creep are the dominant deformation mechanisms in this zone, as most of the constituent minerals are yet too cold for appreciable crystal plastic creep. The apparent frequency of underplating at this depth may correlate directly to a transition in rheological behavior of subducting sediments (e.g. compaction or cementation hardening) or the oceanic plate that results in downstepping of the plate boundary thrust to a lower stratigraphic level (beneath the sediments or into the upper oceanic crust; Kimura and Ludden, 1995; Kimura et al. 2010). We review four examples from three accretionary complexes. Three are major paleo-decollements and one (Rodeo Cove) is an intra-terrane imbricate thrust which probably accommodated less total displacement than the others, but is mature enough to show a similar structural pattern.

### ***Mugi Mélange***

The Mugi Mélange in Japan's Shimanto Belt is composed of at least two fault-bounded units, each  $< 200$  m thick. The upper unit contains older detrital zircons (66-73 Ma) and vitrinite reflectance suggests temperatures of  $170-200^{\circ}\text{C}$ , while the lower contains younger detrital zircons (58-64 Ma) and vitrinite reflectance suggests temperatures of  $130-150^{\circ}\text{C}$  (Ikesawa et al. 2005; Kitamura et al. 2005). Fluid inclusion thermobarometry suggests temperatures of  $150-200^{\circ}\text{C}$  at depths of 4-6 km during mélange formation, assuming fluid pressure was lithostatic (Matsumura et al. 2003). Ikesawa et al. (2005) and subsequent papers appear to have reinterpreted the fluid inclusion pressure measurements from Matsumura et al. (2003) to imply a depth of 6-7 km (hydrostatic fluid pressure). As in the case of the Rodeo Cove thrust, structural repetition of fault-bound slices of the uppermost oceanic crust are evidence for sequential building of the Mugi Mélange during episodic down-stepping of the décollement, creating a cumulative duplex structure (Kimura et al., 2012). The individual fault strands, such as the boundary between the two

sections of the *mélange*, are ~1 - 30 m thick (Ikesawa et al., 2005). Discrete surfaces of highly localized shearing are represented by ultracataclasites 2-20 cm thick, pseudotachylytes less than a few mm-thick, and veined fault surfaces (< 1 cm thick; Ikesawa et al., 2005; Kimura et al. 2012).

### ***Okitsu Mélange***

The Okitsu *Mélange* outcrops along strike from the Mugi *Mélange* in the Shimanto Belt on Shikoku Island (Ikesawa et al., 2003; Sakaguchi et al., 2003). The roof thrust of the *mélange* is 3-5 m thick and contains pseudotachylytes less than a few mm thick (Ujiie et al., 2007b). Individual *mélange* terranes are ~100-200 m thick, imbricated below the roof thrust forming large-scale duplex structure (Sakaguchi et al., 2003, Kimura et al. 2012). The depth of activity of this fault has not been specifically reported. Sakaguchi et al. (2003) argued for a transiently high geotherm of ~90°C/km caused by a ridge subduction event, and placed peak temperature at 190-270°C. If these numbers are correct, the depth of fault activity was 2-3 km, similar to the estimates from methane fluid inclusions (~1.5-4 km; Sakaguchi 1996). However, kinematic studies have suggested that the Okitsu *Mélange* was formed under the same thermal conditions as the Mugi *Mélange*, at great depths down the subduction thrust (e.g. Onishi and Kimura, 1995). If this is the case, the depth might actually be as much as 7-9 km, but as the majority of recent literature favors the shallower depth, and the distinction does not change any of our conclusions. It is also possible that the measured vitrinite reflectance within the Okitsu *Mélange* was elevated by mechanical effects of shear, compounding the thermal effects and resulting in an artificially elevated estimated temperature (Fulton & Harris, 2012; Mastalerz et al. 1993). This example is somewhat distinct from the others in that as a roof thrust of a duplex structure, it may have been active for only a brief proportion of the time of subduction, so in that way may more closely resemble an immature faults.

### ***The Rodeo Cove thrust***

The Rodeo Cove thrust separates tectonic slivers of basalt and sediments in the Marin Headlands Terrane of the Franciscan Complex of California (Meneghini and Moore 2007, Wakabayashi 1992). It is interpreted to represent an internal imbricate thrust within the duplex of the Marin Headlands Terrane, which is underthrust only a few meters below by the Point Bonita Terrane, an underplated seamount with OIB geochemical affinity. Faulting was active at 8-10 km depth and 200-250°C. The total fault thickness is ~ 200 m, with a high strain fault strand thickness of 30-40 m. Within this zone, numerous discrete shears 0.1-20 cm thick are found in P and R orientations. Meneghini and Moore (2007) argue that the lack of development of a dominant fault core, and maintenance of numerous individual slip surfaces, can be explained by the abundant calcite veins and cements which re-strengthened rupture surfaces after each slip.

### ***The Pasagshak Point thrust***

The Pasagshak Point Thrust, exposed on Kodiak Island, Alaska, is an ancient subduction décollement active in the earliest Paleocene at a depth of 12-14 km and ~250°C (Rowe et al. 2011, Vrolijk et al., 1988). The preserved plate boundary consists of anastomosing

strands of cataclastic fault rock 7-31 m thick, spaced over a total structural thickness of ~400 m. These fault strands crosscut the formation-scale Ghost Rocks mélangé, which contains distributed small faults and zones of disrupted strata (1-2 km thick; Fisher & Byrne, 1987). The deformation fabrics in the Ghost Rocks mélangé represent progressive flattening and shearing during subduction of the sediment pile. At the depth of underplating (12-14 km), only the anastomosing cataclastic fault strands were active. These strands contain pseudotachylyte-bearing faults 5-30 cm thick, and broken fragments of older pseudotachylytes, demonstrating that the thicker cataclastic zones were intermittently active between earthquakes (Rowe et al. 2011). As the pseudotachylyte-bearing black fault rocks are observed to collect and pool in the areas of greatest thickness, we estimate the co-seismic slip surfaces to be maximum 10-20 cm thick.

### ***El Cerrito Quarry thrust / Hillside Mélangé***

The Franciscan Complex is home to several formation-scale (few km thick) mélangé terranes, previously interpreted to represent subduction décollements (Wakabayashi 2011). Recent detailed structural, metamorphic, geochronologic and provenance studies have revealed internal structure in at least one of these which indicates that the thickness of tectonically sheared section is much thinner than the total mapped width of the mélangé. Based on the pressure/temperature conditions of peak metamorphism of the footwall rocks, and by comparison to metamorphic studies of similar Franciscan sediments, Wakabayashi (2013) estimates the fault was active at 15 km and 250-350°C. The Hillside mélangé (thickness ~ 100-200 m) has been interpreted by Wakabayashi (2013) as a subducted sedimentary mélangé where only the uppermost 10-20 m have strong shear fabric and mixed hanging wall and footwall material (the El Cerrito Quarry thrust), are interpreted to have accommodated the majority of the total displacement of 100-300 km. Due to limited exposure in the landslide-dominated Coast Ranges of California, it is unknown whether the Hillside Mélangé contains multiple fault strands below the El Cerrito Quarry thrust, so an effective total thickness of the décollement cannot be estimated but a maximum estimate is the total thickness of the Hillside mélangé (100-200 m). Individual earthquake slip surfaces are recorded as sharp thin layers of black fault rock, and range from ~1 cm to 1 mm in thickness.

### ***Caveats in compilation***

Ocean drilling cores are susceptible to drilling damage, which may artificially increase the estimated thickness of fault-induced shear fabric, while outcrop measurements are not. For example, Site 808 in the Nankai Trough was studied on two ODP drilling legs (Leg 131 and Leg 196). Leg 131 reported a single ~19 m-thick strand. Leg 196 reported a multi-stranded fault with thin strands over a depth interval that would include the single fault reported by Leg 131 (Shipboard Science Party 1991; 2002). Within this uncertainty it is possible that some fault strands thicken with depth but our data do not reveal any trends.

## References not cited in main article

Fisher, D., and Byrne, T., (1987) Structural evolution of underthrust sediments, Kodiak Islands, Alaska. *Tectonics* v. 6 n. 6 p. 775-793.

Fulton, P. and Harris, R. (2012) Thermal considerations in inferring frictional heating from vitrinite reflectance and implications for shallow coseismic slip within the Nankai Subduction Zone. *Earth & Planetary Science Letters* v. 335-336 p. 206-215

Kimura, H., Takeda, T., Obara, K., and Kasahara, K. (2010) Seismic evidence for underplating below the megathrust earthquake zone in Japan. *Science* v. 329, pp. 210-212.

Kitamura, Y., Sato, K., Ikesawa, E., Ikehara-Ohmori, K., Kimura, G., Kondo, H., Ujiie, K., Tiemi Onishi, C., Kawabata, K., Hashimoto, Y., Mukoyoshi, H., and Masago, H. (2005) Mélange and its seismogenic roof décollement: A plate boundary fault rock in the subduction zone – An example from the Shimanto Belt, Japan. *Tectonics* v. 24, TC5012, 15 p.

Mastalerz, M., Wilks, K. R., Bustin, R. M. and Ross, J. V. (1993) The effect of temperature, pressure and strain on carbonization in high-volatile bituminous and anthracitic coals. *Organic Geochemistry*, v. 20 p. 315-325

Matsumura, M., Hashimoto, Y., Kimura, G., Ohmori-Ikehara, K., Enjohji, M., and Ikesawa, E. (2003) Depth of oceanic-crust underplating in a subduction zone: Inferences from fluid-inclusion analyses of crack-seal veins. *Geology* v. 31, n. 11, pp. 1005-1008.

Moore, J. C. and Saffer, D. (2001) Updip limit of the seismogenic zone beneath the accretionary prism of southwest Japan: An effect of diagenetic to low-grade metamorphic processes and increasing effective stress. *Geology* v. 29, n. 2, pp. 183-186.

Onishi, C. T. and Kimura, G. (1995) Change in fabric of mélange in the Shimanto Belt, Japan: Change in relative convergence? *Tectonics* v. 14, n. 5, p. 1273-1289.

Reutter, K. J., Teichmüller, M., Teichmüller, R. and Zanzucchi, G. (1983) The coalification pattern in the Northern Apennines and its palaeogeothermic and tectonic significance. *International Journal of Earth Sciences Geologische Rundschau*, v. 72, pp. 861–894.

Sakaguchi, A. (1996) High paleogeothermal gradient with ridge subduction beneath the Cretaceous Shimanto accretionary prism, southwest Japan. *Geology* v. 24, n. 9, p. 175-179.

Sakaguchi, A., Chester, F., Curewitz, D., Fabbri, O., Goldsby, D., Kimura, G., Li, C.-F., Masaki, Y., Sreaton, E. J., Tsutsumi, A., Ujiie, K., and Yamaguchi, A. (2011) Seismic slip propagation to the updip end of plate boundary subduction interface faults: Vitrinite reflectance geothermometry on Integrated Ocean Drilling Program NanTroSEIZE cores. *Geology* v. 39, n. 4 p. 395-398

Thomson, S. N., Brandon, M. T., Reiners, P. W., Zattin, M., Isaacson, P. J., and Balestrieri, M. L. (2010) Thermochronologic evidence for orogen-parallel variability in wedge kinematics during extending convergent orogenesis of the northern Apennines, Italy. *Geological Society of America Bulletin*, v. 122, n.7-8, pp. 1160–1179.  
doi:10.1130/B26573.1

Vrolijk, P., Myers, G. and Moore, J. C. (1988) Warm fluid migration along tectonic mélanges in the Kodiak accretionary complex, Alaska. *Journal of Geophysical Research* v. 93, pp. 10,313-10,324.

Wakabayashi, J. (1992) Nappes, tectonics of oblique plate convergence, and metamorphic evolution related to 140 million years of continuous subduction, Franciscan Complex, California. *The Journal of Geology* v. 100, n. 1, pp. 19-24.

Zattin, M., Picotti, V., and Gaspare Zuffa, G. (2002). Fission-track reconstruction of the front of the Northern Apennine thrust wedge and overlying Ligurian Unit. *American Journal of Science*, v. 302, n.4, pp.346.
